# Supplementary material for: The UDP-glucose: glycoprotein glucosyltransferase (UGGT), a key enzyme in ER quality control, plays a significant role in plant growth as well as biotic and abiotic stress in Arabidopsis thaliana
Source: PubMed Central journal article supplement (PMC4465474; doi:10.1186/s12870-015-0525-2), 2015-05-28

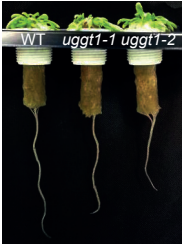

Supplement: 12870_2015_525_MOESM5_ESM.pdf [file 12870_2015_525_MOESM5_ESM.pdf]
